# Supplementary material
Source: PubMed Central journal article supplement (PMC9289707)
Supplement: EMBJ-41-e110655-s002.pdf [file EMBJ-41-e110655-s002.pdf]

## Appendix

# An Engineered Multicellular Stem Cell Niche for the 3D Derivation of Human Myogenic Progenitors from iPSCs

Omid Mashinchian, Filippo De Franceschi, Sina Nassiri, Joris Michaud, Eugenia Migliavacca, Patrick Aouad, Sylviane Metairon, Solenn Pruvost, Sonia Karaz, Paul Fabre, Thomas Molina, Pascal Stuelsatz, Nagabhooshan Hegde, Emmeran Le Moal, Gabriele Dammone, Nicolas A. Dumont, Matthias P. Lutolf, Jerome N. Feige, C. Florian Bentzinger

### Table of contents

**Appendix Figure S1:** Characterization of multi-component embryoids.

**Appendix Figure S2:** Flow cytometry quantification of Pax7 positive cells in multicellular embryoids and Pax7 expression in xeno-free TCEs.

**Appendix Figure S3:** Myogenic commitment factors, endodermal, and ectodermal markers in TCEs.

**Appendix Figure S4:** Flow cytometry validation and comparison of established 2D protocols for myogenic hiPSC differentiation with embryoid derivation.

**Appendix Figure S5:** Expression of pluripotency and lineage markers during iTCE differentiation.

**Appendix Figure S6:** Signaling mechanisms in iTCEs.

**Appendix Figure S7:** Comparison of established 2D protocols for myogenic hiPSC differentiation with eMPs.

**Appendix Figure S8:** Characterization of eMP engraftment in mdx mice.

**Appendix Figure S9:** iTCE scale-up culture in roller bottles.

**Appendix Table S1:** Flow cytometry quantification for Appendix Fig S4D-H.

**Appendix Table S2:** Flow cytometry quantification for Figure 1R and S.

**Appendix Table S3:** Flow cytometry quantification for Appendix Fig S4I.

**Appendix Table S4:** Flow cytometry quantification for Figure 2L-P.

**Appendix Table S5:** Flow cytometry quantification for Appendix Fig S6C and D.

**Appendix Table S6:** Flow cytometry quantification for Figure 3A-I.

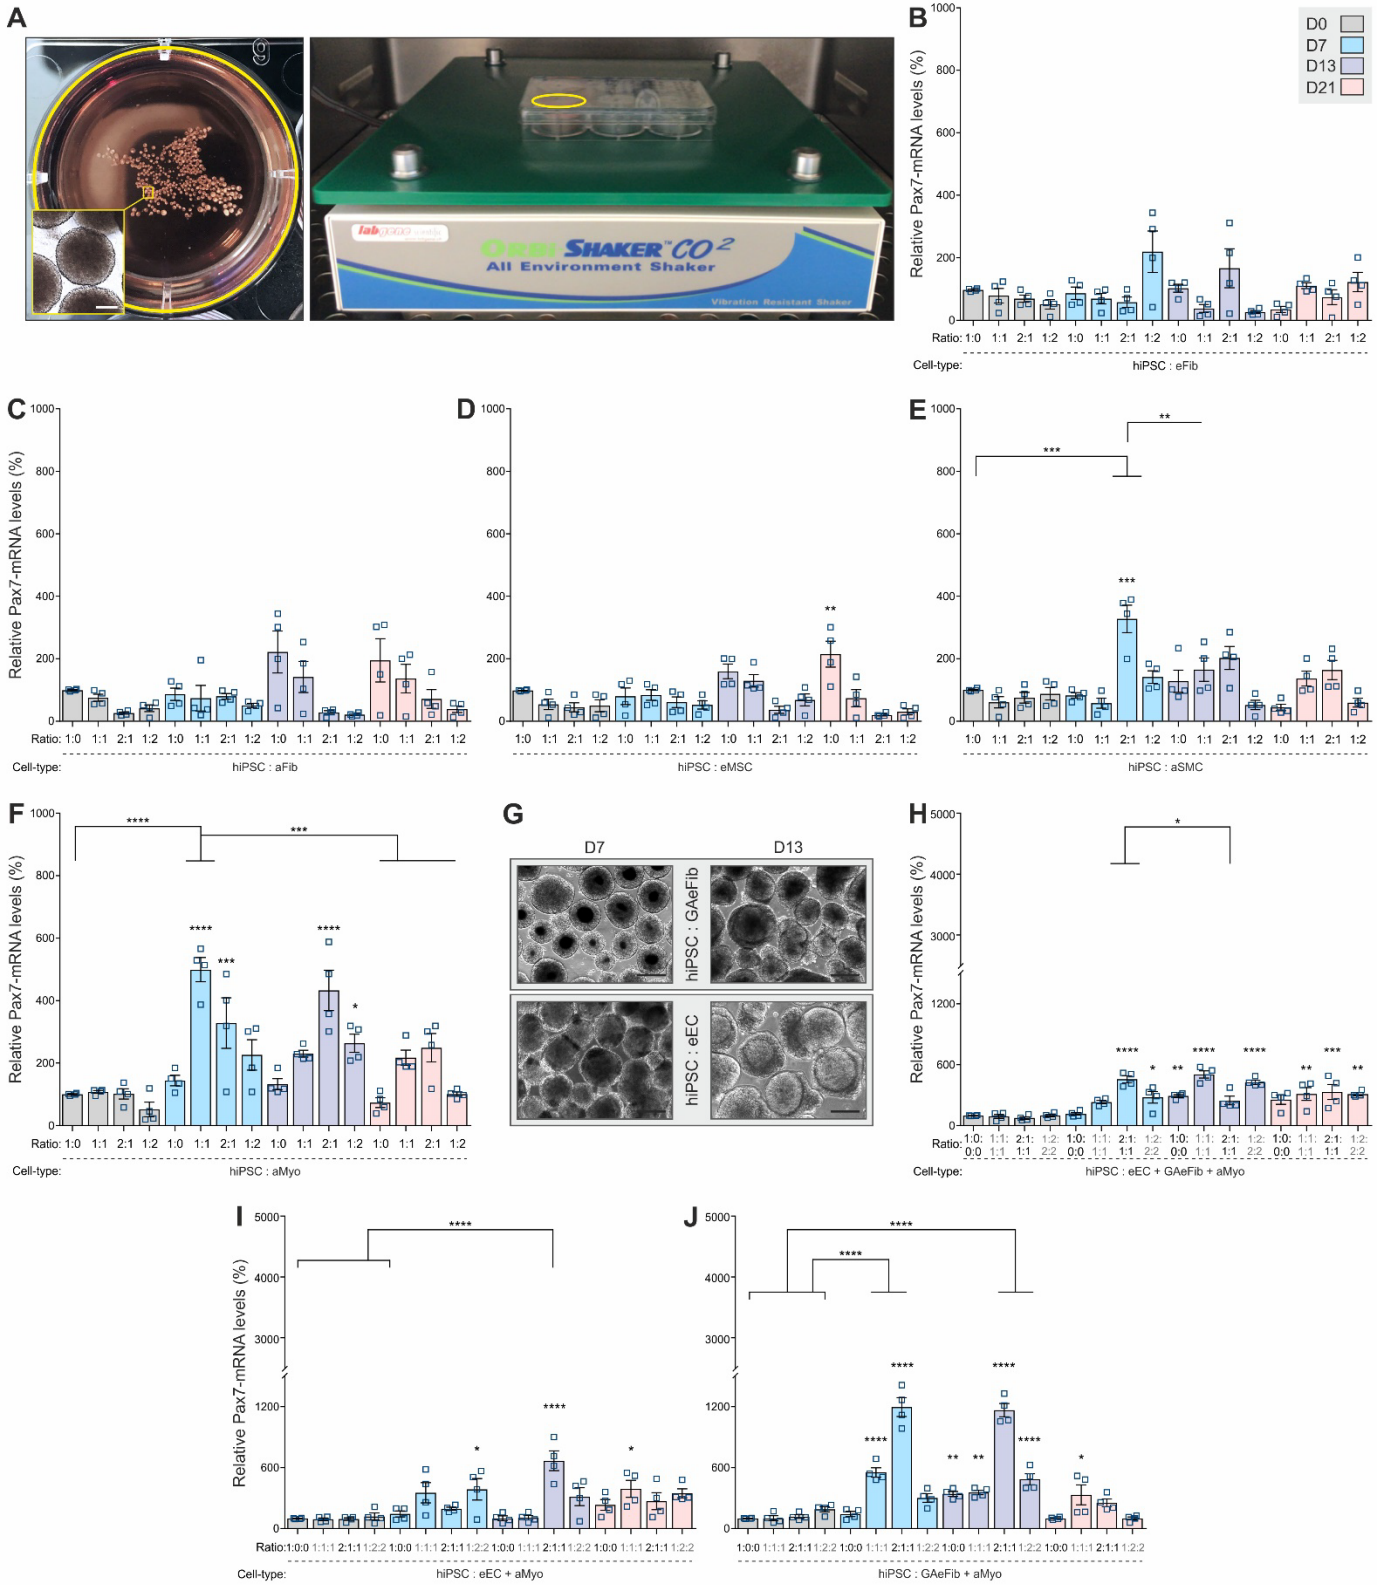

**Appendix Figure S1: Characterization of multi-component embryoids.** **A.** Horizontal shaker platform setup used to generate multi-component embryoids. Scale bar = 50  $\mu\text{m}$ . **B-F.** mRNA expression of Pax7 in embryoids containing different ratios of hiPSCs and embryonic fibroblasts (eFib), adult fibroblasts (aFib), embryonic mesenchymal-like stem cells (eMSC), adult smooth muscle cells (aSMC) or adult myoblasts (aMyo). Mixtures of the respective cell types were interrogated before (D0), and at 7, 13, and 21 days (D7, D13, D21) after aggregation. **G.** Representative brightfield images of embryoids containing hiPSCs and embryonic endothelial cells (eEC) or growth-arrested embryonic fibroblasts (GAeFib) in a 2:1 ratio at D7 and D13. Scale bars = 125 $\mu\text{m}$ . **H-J.** mRNA expression of Pax7 in embryoids containing different ratios of hiPSCs, GAeFib, eEC, aMyo. Mixtures of the respective cell types were interrogated before (D0), and at 7, 13, and 21 days (D7, D13, D21) after aggregation. **B-F, H-J.** Data are represented as means  $\pm$  S.E.M from n=4 independent experiments. **A-J.** hiPSC donor 1. p-values are \*p<0.05, \*\*p<0.01, \*\*\*p<0.001, \*\*\*\*p<0.0001 using ANOVA followed by a Bonferroni post hoc test.

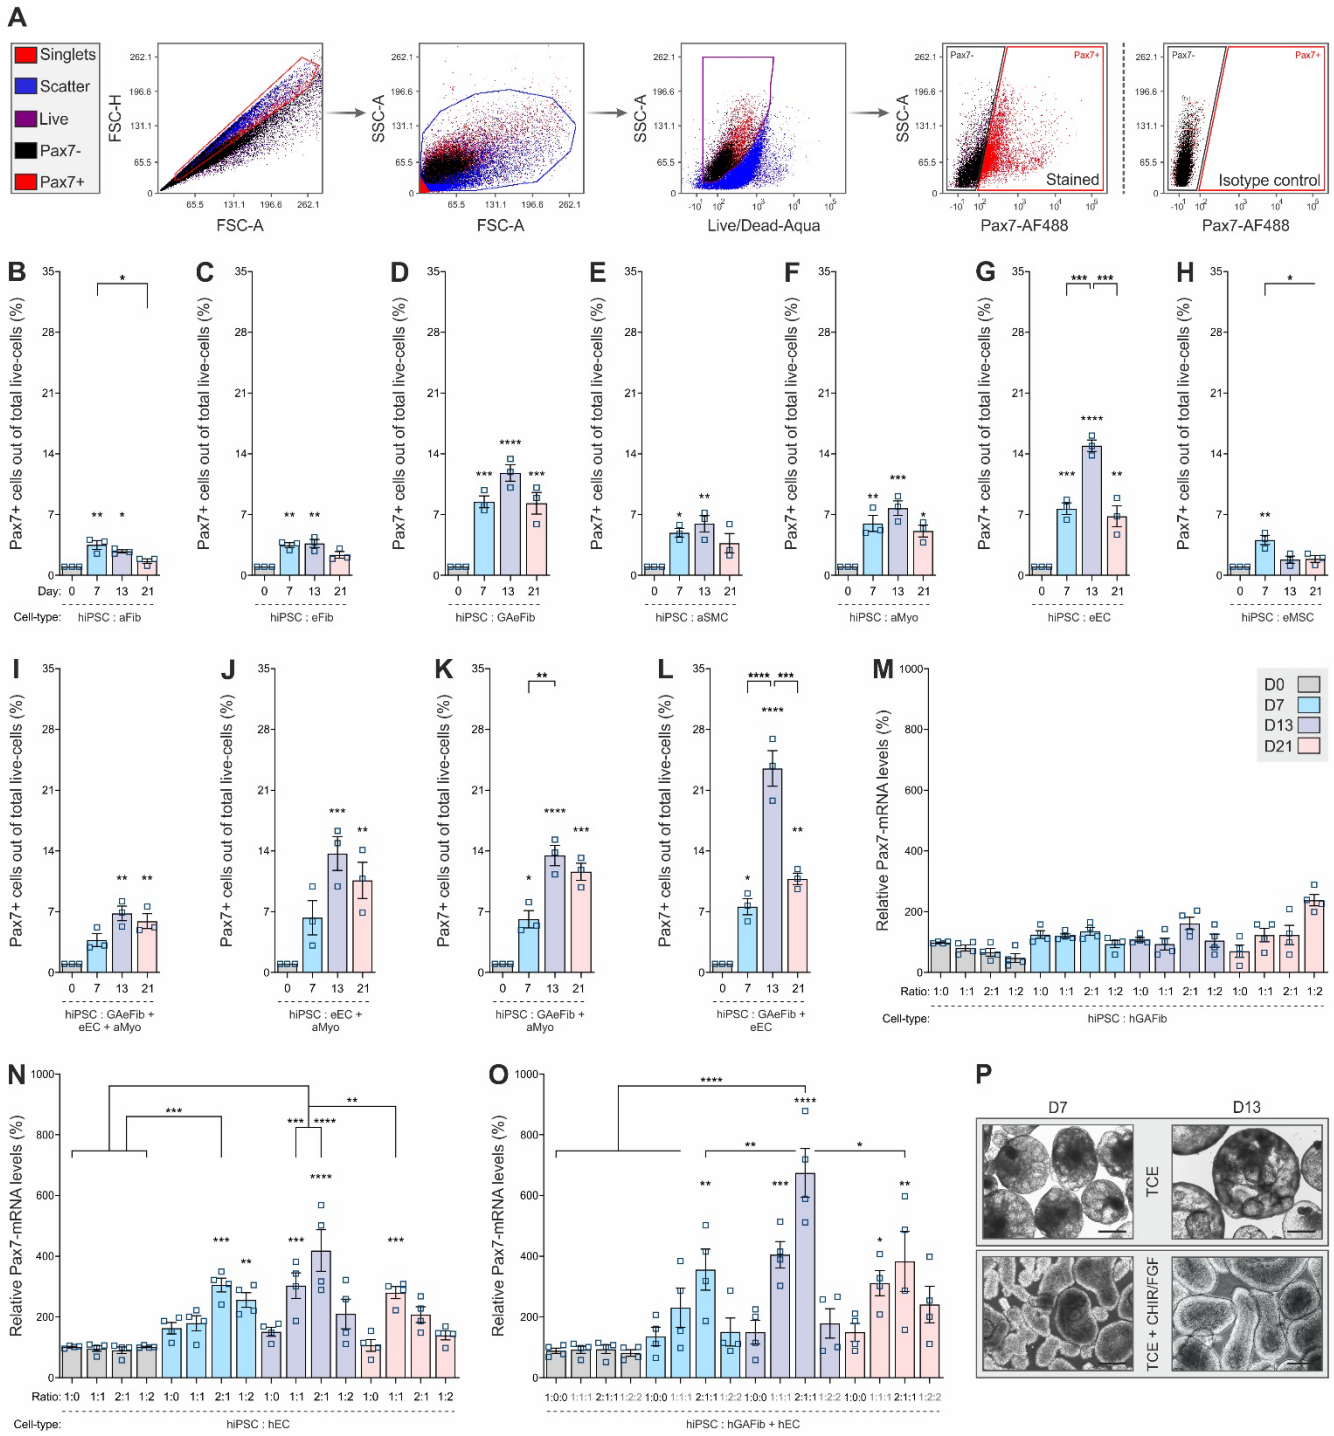



**Appendix Figure S2: Flow cytometry quantification of Pax7 positive cells in multicellular embryoids and Pax7 expression in xeno-free TCEs.** **A.** Flow cytometry gating strategy for quantification of Pax7 positive cells from three-component embryoids (TCEs). **B-L.** Repeat of the screen shown in Fig 1A-D and Appendix Fig S1A-J using an alternative hiPSC donor cell line at a 2:1 ratio of hiPSCs and the different cell types quantified by flow cytometry assessment of Pax7 positive cells. Four or three component embryoids were analyzed at a 2:1:1:1 respectively a 2:1:1 ratio of hiPSCs to different cell types. Embryoids containing hiPSCs and adult fibroblasts (aFib), embryonic fibroblasts (eFib), growth-arrested embryonic fibroblasts (GAeFib), adult smooth muscle cells (aSMC), adult skeletal muscle myoblasts (aMyo), embryonic endothelial cells (eEC), or embryonic mesenchymal-like stem cells (eMSC) were analyzed before (D0), and at 7, 13, and 21 days (D7, D13, D21) after aggregation. **M-O.** mRNA expression of Pax7 in xeno-free embryoids containing different ratios of hiPSCs, human growth-arrested fibroblasts (hGAfFib), and human endothelial cells (hEC). Mixtures of the respective cell types were interrogated before (D0), and at 7, 13, and 21 days (D7, D13, D21) after aggregation. **P.** Representative brightfield images of TCEs containing hiPSCs, eEC, and GAeFib in a 2:1:1 ratio with and without stimulation of the Wnt/FGF pathways. Scale bars = 125 $\mu$ m. **B-O.** Data are represented as means  $\pm$  S.E.M from n=3 (**B-L**) and n=4 (**M-N**) independent experiments. **A.** hiPSC donor 1. **B-L.** hiPSC donor 2, **M-P.** hiPSC donor 1. p-values are \*p<0.05, \*\*p<0.01, \*\*\*p<0.001, \*\*\*\*p<0.0001 using ANOVA followed by a Bonferroni post hoc test.

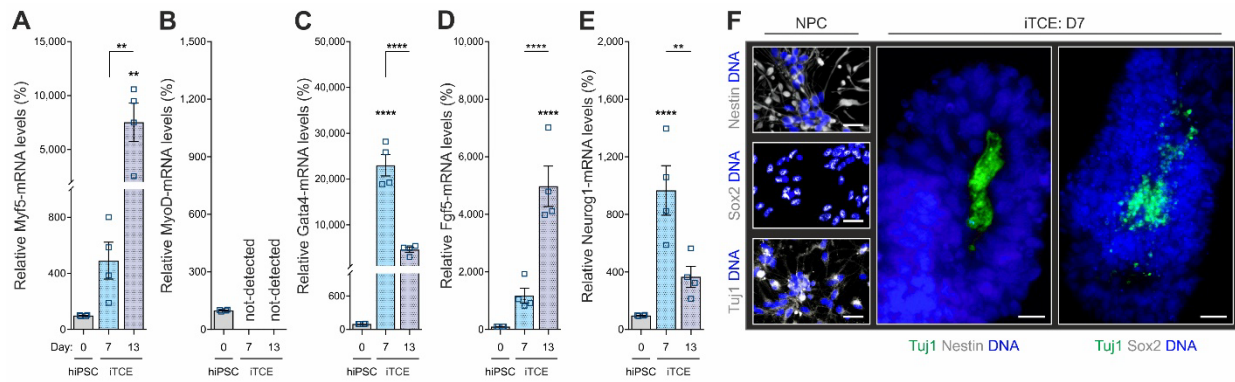

**Appendix Figure S3: Myogenic commitment factors, endodermal, and ectodermal markers in TCEs.** **A-E.** mRNA expression of the myogenic commitment markers Myf5 and MyoD, the endoderm marker Gata4, and the ectoderm markers Fgf5 and neurog1 in hiPSCs and Wnt/FGF induced TCEs (iTCEs) at D7 and D13. **F.** Representative stainings for the neuronal progenitor markers Tuj1, Nestin, and Sox2 in Wnt pathway induced D7 iTCEs. Human neural progenitor cells (NPCs) are shown as a positive control. Scale bars in the three left-hand side images = 25 $\mu$ m, scale bar on the two larger right-hand side images = 20 $\mu$ m. **A-E.** Data are represented as means  $\pm$  S.E.M from n=4 independent experiments. **A-F.** hiPSC donor 1. p-values are \*p<0.05, \*\*p<0.01, \*\*\*p<0.001, \*\*\*\*p<0.0001 using an ANOVA followed by a Bonferroni post hoc test.

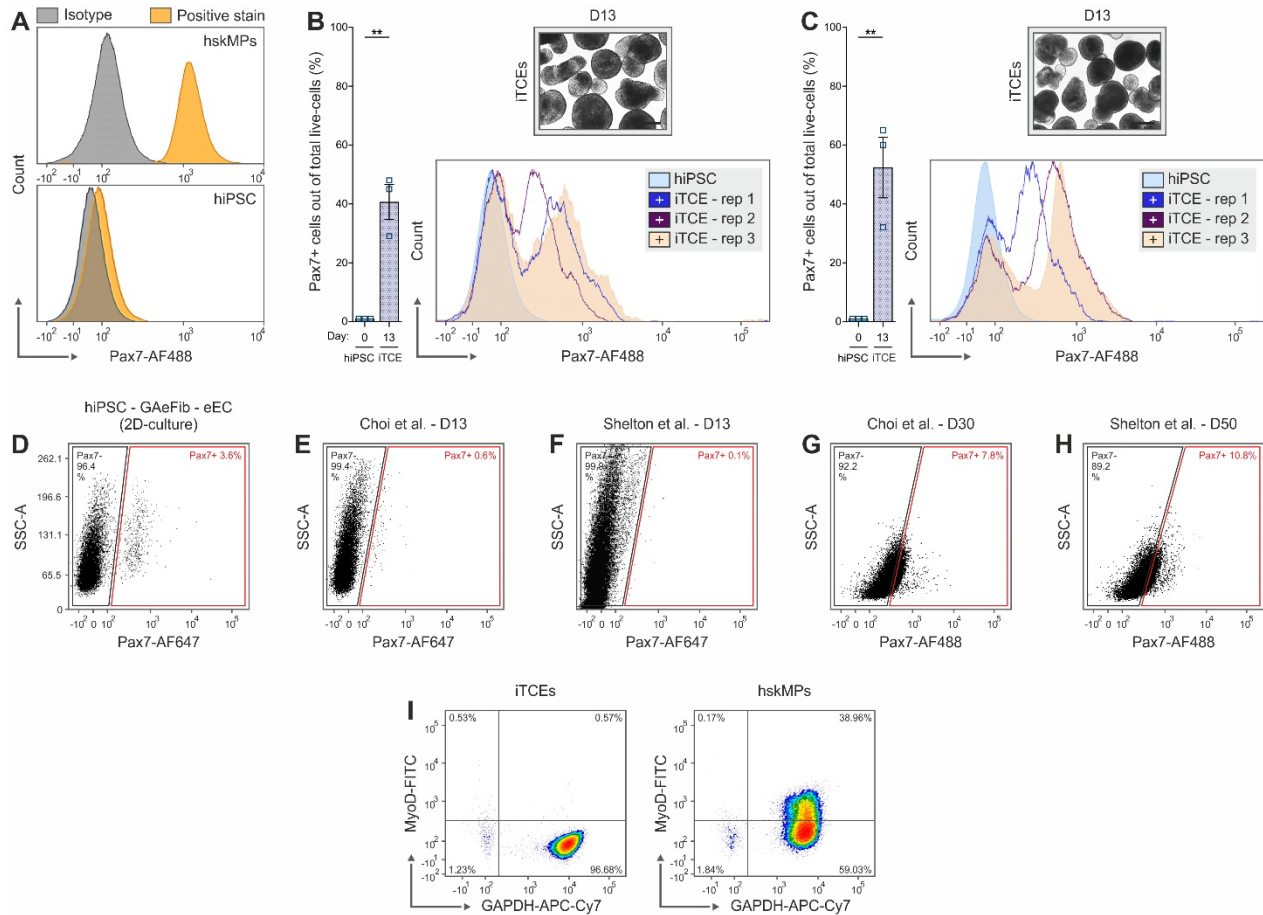

**Appendix Figure S4: Flow cytometry validation and comparison of established 2D protocols for myogenic hiPSC differentiation with embryoid derivation.**

**A.** Flow cytometry validation of the Pax7 antibody using hiPSCs and hskMPs. **B,C.** Flow cytometry quantification of Pax7 positive cells from day 13 (D13) iTCEs containing hiPSCs lines from donor 2 (b) and donor 3 (c) with representative images. As a control, hiPSCs before aggregation (D0) are shown. **D.** Flow cytometry quantification of Pax7 in hiPSCs co-cultured with GAeFib and eEC in 2D over two weeks. Wnt pathway activation was induced from day 1-7 and bFGF stimulation from day 7-13. **E,F.** Flow cytometry quantification for Pax7 in hiPSC cultures differentiated for two weeks according to Choi or Shelton et al. (Choi et al., 2016, Shelton et al., 2014). **G,H.** Flow cytometry quantification for Pax7 with the Choi and Shelton protocols completed at day 30 (D30) and day 50 (D50), respectively. **I,** RNA fluorescence in situ hybridization for the myogenic commitment marker MyoD and the positive control GAPDH in hskMPs and cells derived from D13 iTCEs quantified by flow cytometry. **B,C.** Data are represented as means  $\pm$  S.E.M from n=3 independent experiments. **D-I.** Representative sorts of  $\geq 3$  repeats are provided in Appendix Table S1 and S3. **A,D-I.** hiPSC donor 1. **B.** hiPSC donor 2. **C.** hiPSC donor 3. p-values are \* $p < 0.05$ , \*\* $p < 0.01$ , \*\*\* $p < 0.001$ , \*\*\*\* $p < 0.0001$  using a students t-test.

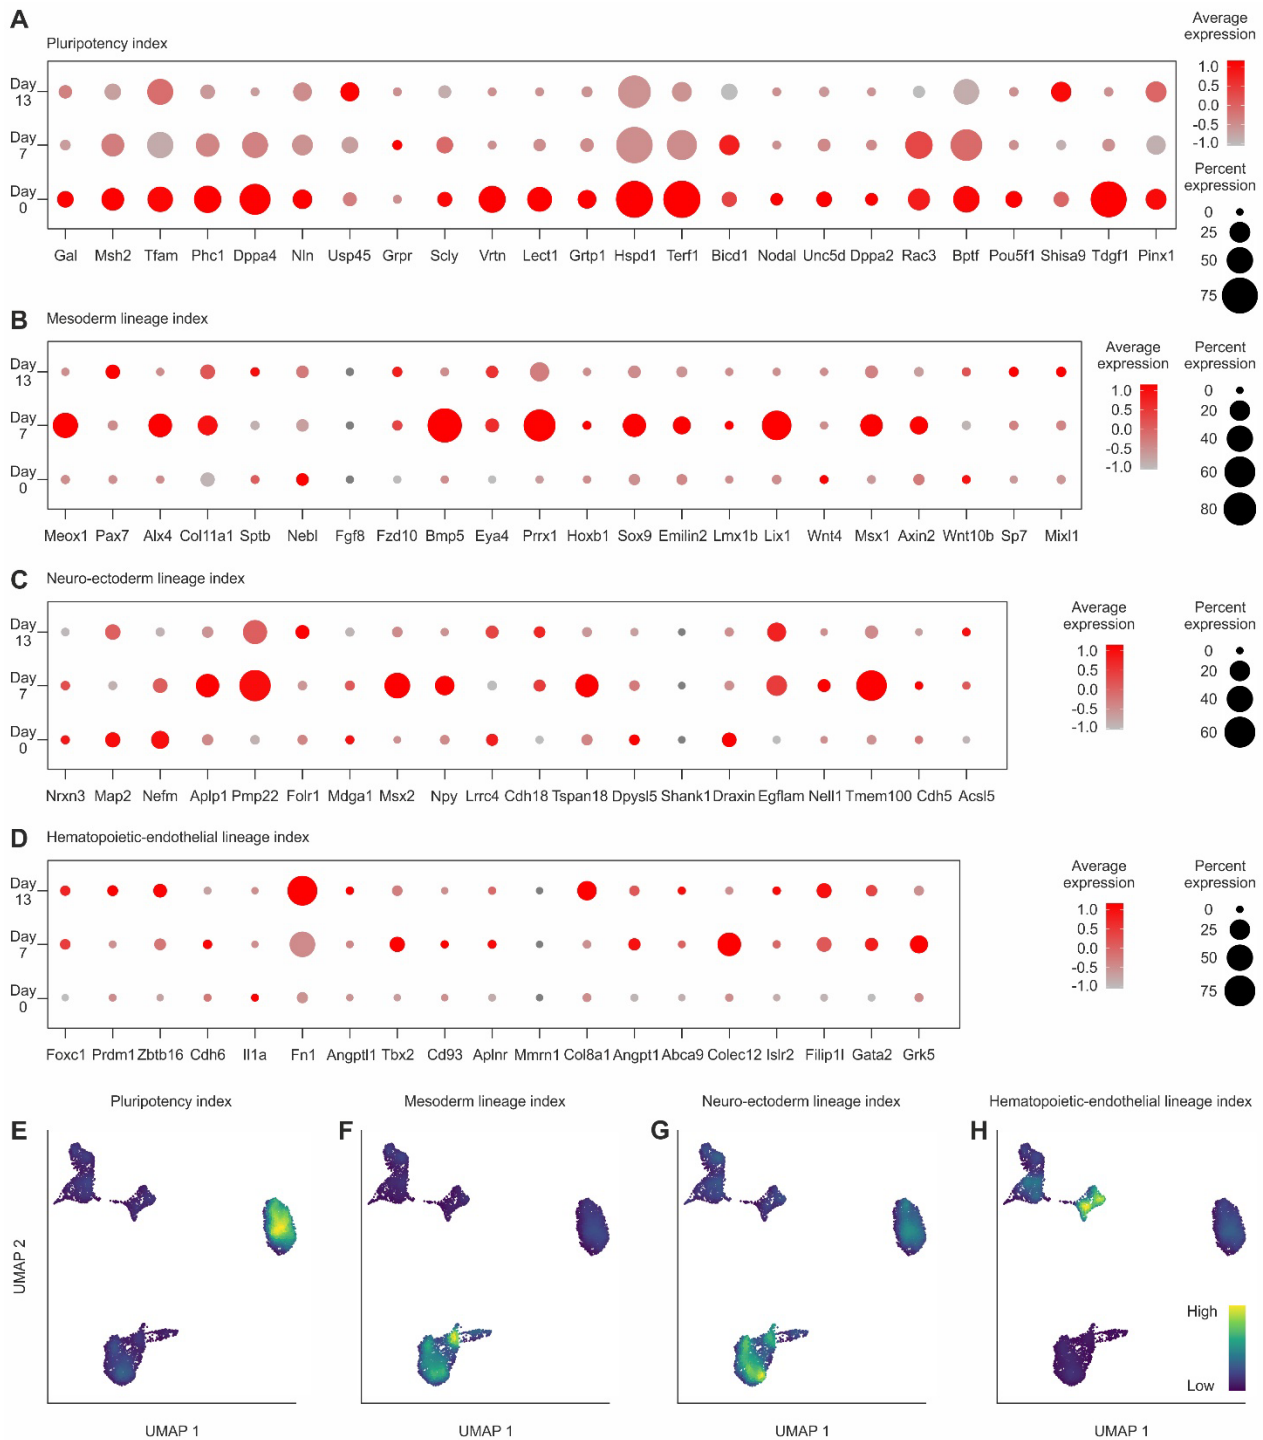

**Appendix Figure S5: Expression of pluripotency and lineage markers during iTCE differentiation.** **A-D.** Gene expression dot plots of single cells before aggregation (day 0), and from day 7 and 13 iTCEs visualizing the pluripotency, mesodermal, neuro-ectodermal, and hematopoietic-endothelial lineage index. **E-F.** 2D UMAP projection visualizing human single-cell transcriptomes of day 0, 7, and 13 iTCEs overlaid with the joint gene density of the pluripotency, mesodermal, neuro-ectodermal, and hematopoietic-endothelial lineage index. **A-H.** hiPSC donor 1.

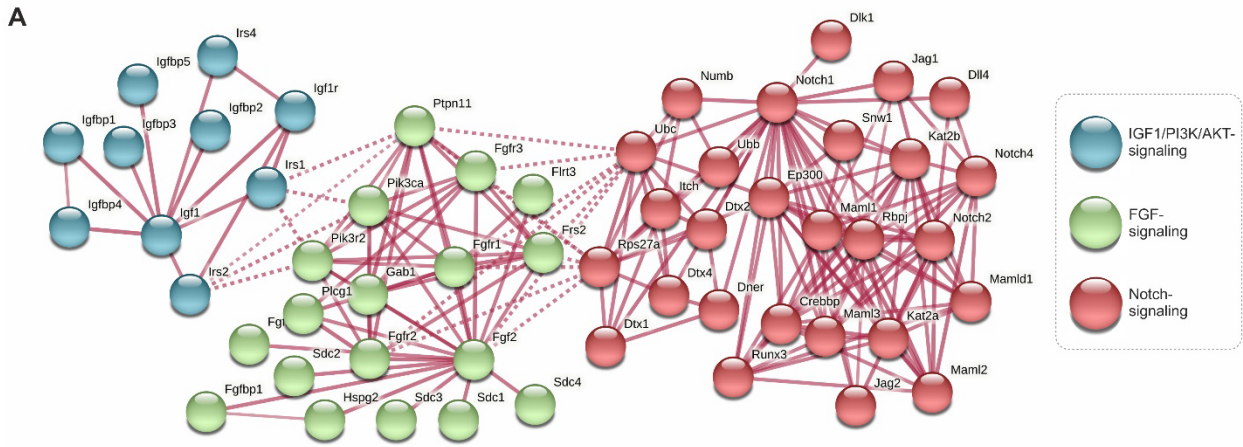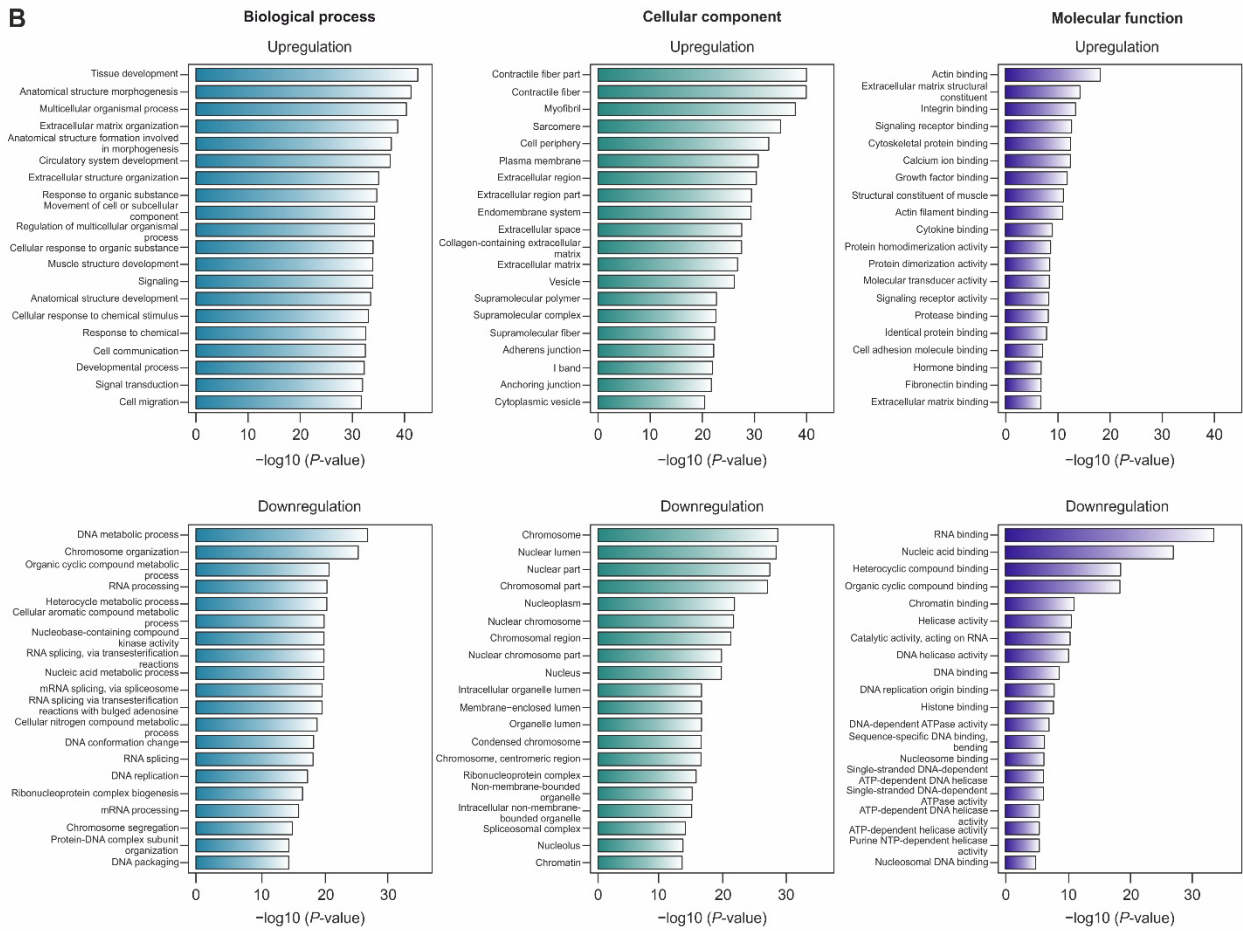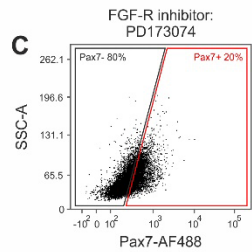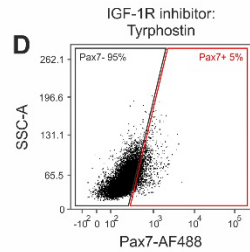

**Appendix Figure S6: Signaling mechanisms in iTCEs.** **A.** String network of extracellular ligands involved in the IGF/PI3K/AKT, FGF, and Notch pathways highly expressed in iTCEs. Nodes with an interaction score  $>0.7$  are represented and colored according to pathways using an inflation parameter of 3. **B.** Go-analysis of the top 20 up- or downregulated categories in the biological process, cellular component, and molecular function ontologies in iTCEs compared to Wnt/FGF stimulated hiPSC mono-aggregates. **C,D.** Flow cytometry quantification for Pax7 in D13 iTCEs incubated with an FGF-receptor (FGF-R) and an IGF1-receptor (IGF-1R) inhibitor. Representative sorts of  $n \geq 3$  repeats are provided in Appendix Table S5. **A-D.** hiPSC donor 1.



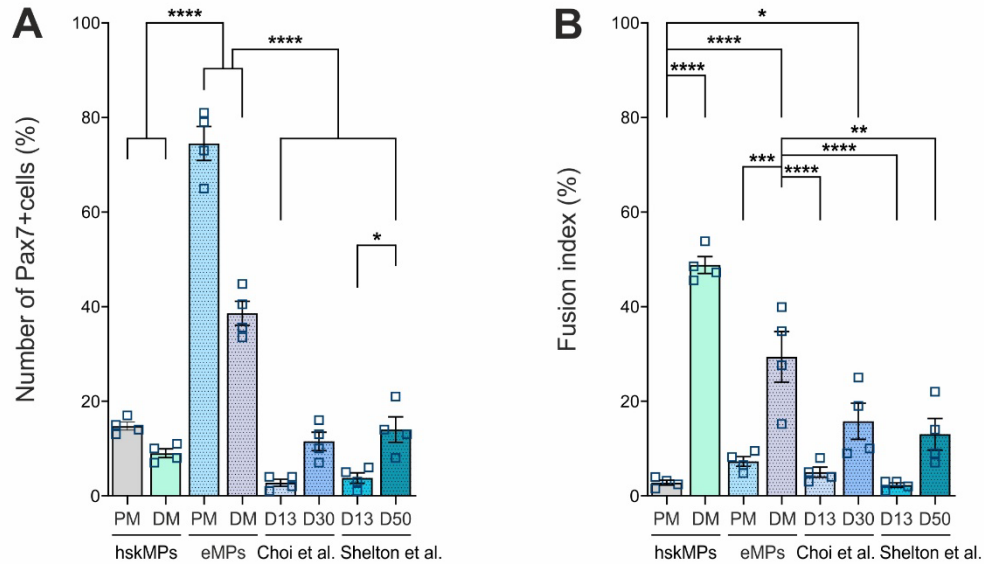

**Appendix Figure S7: Comparison of established 2D protocols for myogenic hiPSC differentiation with eMPs.** **A.** Quantification of the number of Pax7 positive cells in cultures of primary human skeletal muscle progenitors (hskMPs) and embryonic-like myogenic progenitors (eMPs) that were flow cytometrically isolated from iTCEs in proliferation (PM) and differentiation (DM) medium, as well as in hiPSC cultures differentiated according to Choi or Shelton et al. (Choi et al., 2016, Shelton et al., 2014) at two weeks (D13) and at the endpoint of the respective protocols at day 30 (D30) and day 50 (D50). **B.** Quantification of the fusion index in cultures of hskMPs and eMPs that were flow cytometrically isolated from iTCEs in PM and DM, as well as in hiPSC cultures differentiated according to Choi or Shelton et al. at D13 and at the endpoint of the respective protocols at D30 and D50. Data are represented as means  $\pm$  S.E.M from  $n=4$  independent experiments. **A,B.** hiPSC donor 1. p-values are \* $p<0.05$ , \*\* $p<0.01$ , \*\*\* $p<0.001$ , \*\*\*\* $p<0.0001$  using an ANOVA followed by a Bonferroni post hoc test.



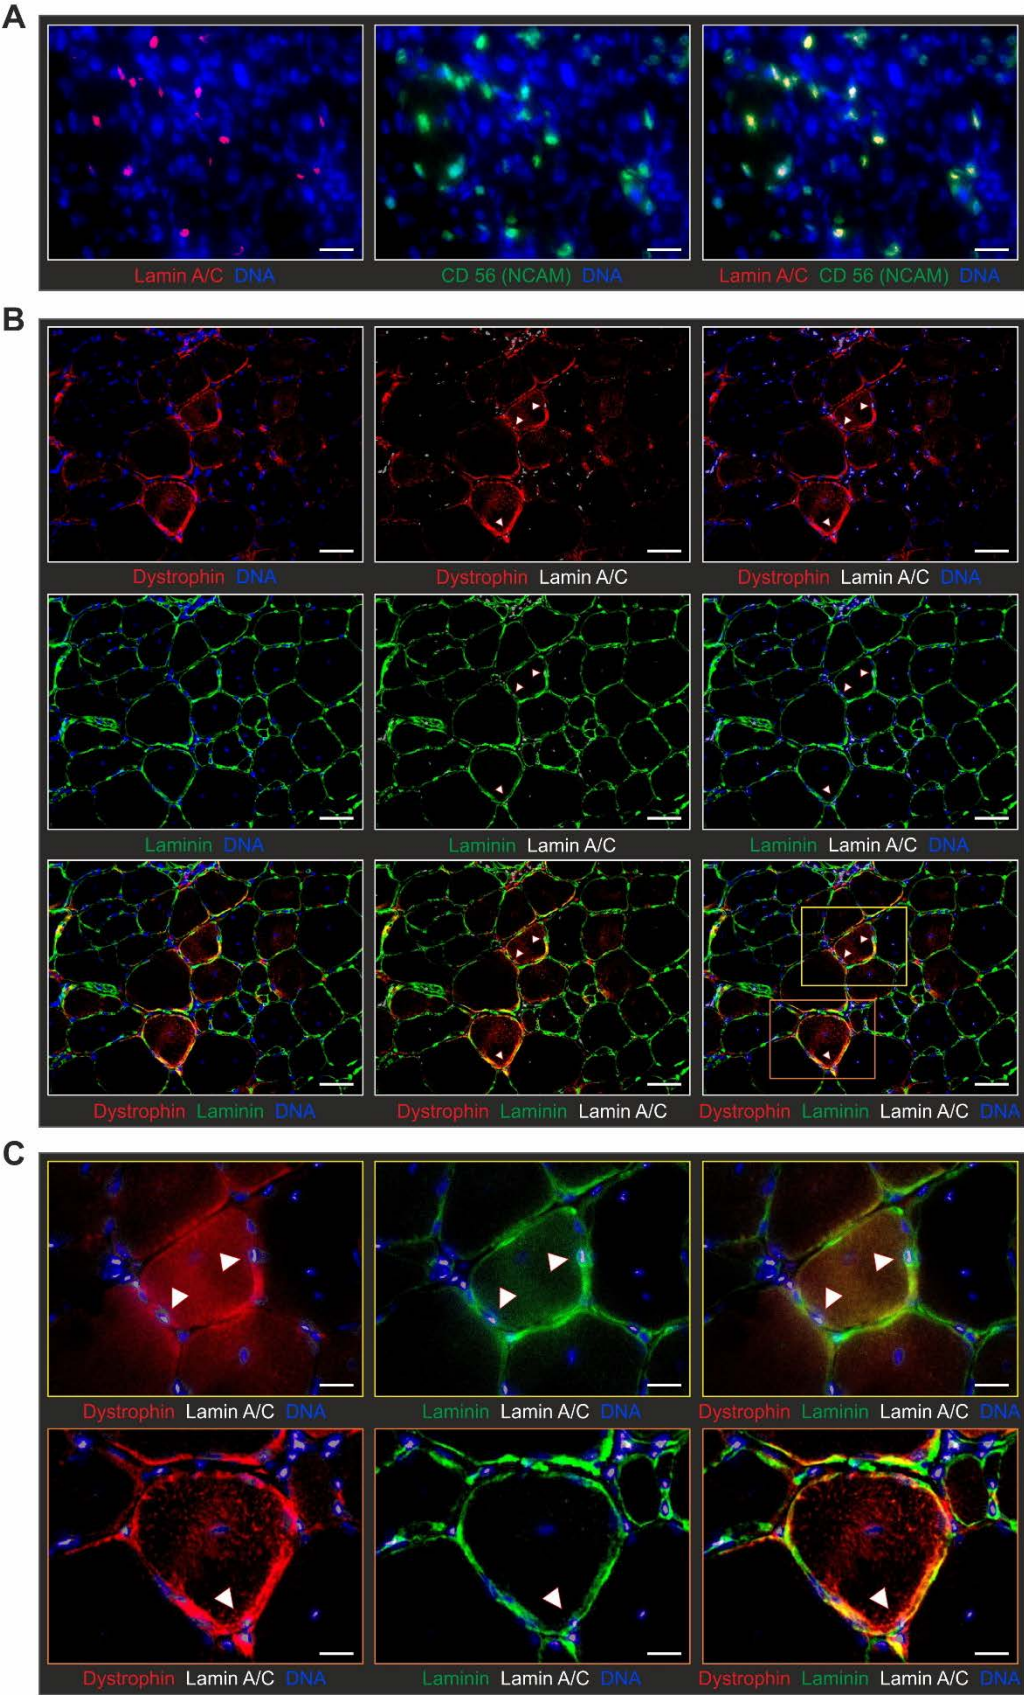

**Appendix Figure S8: Characterization of eMP engraftment in mdx mice.** **A.** Representative immunostainings for human nuclear marker lamin A/C and CD56 in cross-sections of muscles of mdx mice after transplantation of eMPs. Scale bars = 25 $\mu$ m. **B,C.** Representative immunostainings for lamin A/C, dystrophin, and laminin in cross-sections of muscles of mdx mice after transplantation of eMPs. Arrowheads show lamin A/C positive cells in the satellite cell position in the periphery of dystrophin positive fibers. **B.** Scale bars = 50 $\mu$ m. **C.** Scale bars = 25  $\mu$ m. **A-C.** 25 days post-transplantation.

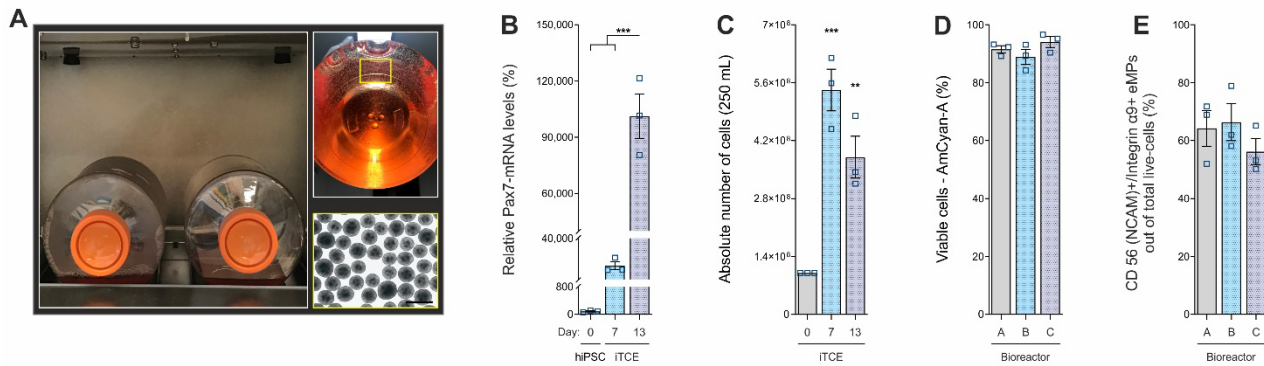

**Appendix Figure S9: iTCE scale-up culture in roller bottles.** **A.** Representative images of roller-bottle cultures and iTCEs generated using this system. **B.** mRNA expression of Pax7 in hiPSCs before aggregation (D0) and iTCEs at D7 and D13. **C.** Absolute number of cells before aggregation (D0) and iTCEs at D7 and D13 quantified by trypan blue staining. **D.** Calcein-AM and ethidium homodimer-1 based flow cytometric assessment of cell viability across different roller bottle bioreactors containing iTCEs after 13 days of culture. **E.** Flow cytometry quantification of the percentage of embryonic-like myogenic progenitors (eMPs) isolated using CD56 and integrin  $\alpha 9$  across different roller bottle bioreactors containing iTCEs after 13 days of culture. **A.** Scale bar = 125 $\mu$ m. **B-E.** Data are represented as means  $\pm$  S.E.M from n=3 independent experiments. **A-E.** hiPSC donor 1. p-values are \*p<0.05, \*\*p<0.01, \*\*\*p<0.001, \*\*\*\*p<0.0001 using ANOVA followed by a Bonferroni post hoc test.

| 2D-protocols  | hiPSC -<br>GAeFib - eEC<br>(2D-culture) | Choi et al. -<br>D13 | Shelton et al. -<br>D13 | Choi et al. -<br>D30 | Shelton et al. -<br>D50 |
|---------------|-----------------------------------------|----------------------|-------------------------|----------------------|-------------------------|
| Pax7+: Rep 1. | 3.61                                    | 0.6                  | 0.1                     | 8.6                  | 9.78                    |
| Pax7+: Rep 2. | 2.87                                    | 0.68                 | 0.18                    | 7.8                  | 9.75                    |
| Pax7+: Rep 3. | 2.59                                    | 0.89                 | 1.1                     | 3.92                 | 10.81                   |
| Pax7-: Rep 1. | 96.39                                   | 99.4                 | 99.9                    | 91.4                 | 90.22                   |
| Pax7-: Rep 2. | 97.13                                   | 99.32                | 99.82                   | 92.2                 | 90.25                   |
| Pax7-: Rep 3. | 97.41                                   | 99.11                | 98.9                    | 96.08                | 89.19                   |

**Appendix Table S1: Flow cytometry quantification for Appendix Fig S4D-H.** The table shows the results of 3 independent experimental repeats (Rep) in percent of total cells.

| RNA-FISH probes | MyoD-FITC+ / Myf5-APC+ | MyoD-FITC+ | Myf5-APC+ |
|-----------------|------------------------|------------|-----------|
| iTCEs: Rep 1.   | 0.84                   | 0.03       | 15.57     |
| iTCEs: Rep 2.   | 1.12                   | 0.08       | 15.11     |
| iTCEs: Rep 3.   | 0.69                   | 0.7        | 13.89     |
| hskMPs: Rep 1.  | 40.92                  | 1.27       | 53.01     |
| hskMPs: Rep 2.  | 43.18                  | 1.81       | 50.81     |
| hskMPs: Rep 3.  | 41.19                  | 0.9        | 54.18     |

**Appendix Table S2: Flow cytometry quantification for Figure 1R and S.** The table shows the results of 3 independent experimental repeats (Rep) in percent of total cells.

| RNA-FISH probes | MyoD-FITC+ / GAPDH-APC-Cy7 | MyoD-FITC+ | GAPDH-APC-Cy7 |
|-----------------|----------------------------|------------|---------------|
| iTCEs: Rep 1.   | 0.57                       | 0.53       | 96.68         |
| iTCEs: Rep 2.   | 0.19                       | 0.68       | 96.19         |
| iTCEs: Rep 3.   | 0.11                       | 0.4        | 97.85         |
| hskMPs: Rep 1.  | 38.96                      | 0.17       | 59.03         |
| hskMPs: Rep 2.  | 41.15                      | 1.18       | 56.13         |
| hskMPs: Rep 3.  | 39.8                       | 1.11       | 57.11         |

**Appendix Table S3: Flow cytometry quantification for Appendix Fig S4I.** The table shows the results of 3 independent experimental repeats (Rep) in percent of total cells.

| Inhibitor type | Control:<br>no inhibitor | MEK inhibitor:<br>PD98059 | Notch inhibitor:<br>DAPT | PI3K inhibitor:<br>LY294002 | AKT inhibitor:<br>MK-2206 |
|----------------|--------------------------|---------------------------|--------------------------|-----------------------------|---------------------------|
| Pax7+: Rep 1.  | 47.16                    | 4.32                      | 1.87                     | 2.52                        | 6.9                       |
| Pax7+: Rep 2.  | 43.26                    | 4.11                      | 2.01                     | 2.4                         | 3.65                      |
| Pax7+: Rep 3.  | 48.14                    | 4.01                      | 1.81                     | 2.45                        | 3.1                       |
| Pax7-: Rep 1.  | 52.84                    | 95.68                     | 98.13                    | 97.48                       | 93.1                      |
| Pax7-: Rep 2.  | 56.74                    | 95.89                     | 97.99                    | 97.6                        | 96.35                     |
| Pax7-: Rep 3.  | 51.86                    | 95.99                     | 98.19                    | 97.55                       | 96.9                      |

**Appendix Table S4: Flow cytometry quantification for Figure 2L-P.** The table shows the results of 3 independent experimental repeats (Rep) in percent of total cells.



| Inhibitor type | FGF-R inhibitor:<br>PD173074 | IGF-1R inhibitor:<br>Tyrphostin |
|----------------|------------------------------|---------------------------------|
| Pax7+: Rep 1.  | 20.54                        | 4.4                             |
| Pax7+: Rep 2.  | 19.65                        | 4.81                            |
| Pax7+: Rep 3.  | 20.31                        | 4.37                            |
| Pax7-: Rep 1.  | 79.46                        | 95.6                            |
| Pax7-: Rep 2.  | 80.35                        | 95.19                           |
| Pax7-: Rep 3.  | 79.69                        | 95.63                           |

**Appendix Table S5: Flow cytometry quantification for Appendix Fig S6C and D.** The table shows the results of 3 independent experimental repeats (Rep) in percent of total cells.

| Surface marker | Pax7-AF488+ / CD 56 (NCAM) -PE-Cy7+ | Pax7-AF488+ / Integrin $\alpha$ 9-APC-Cy5.5+ | Pax7-AF488+ / CD 271 (NGFR) -PerCP-Cy5.5+ | Pax7-AF488+ / CD 82 (Kai-1)-AF647+ | Pax7-AF488+ / CD 362 (SDC2)-APC+ | Pax7-AF488+ / CD 54 (ICAM)-BV605 | Pax7-AF488+ / CD 34-BV605 | Pax7-AF488+ / CD 57 (HNK-1)-PE-CF594 | CD 56 (NCAM) -PE-Cy7+ / Integrin $\alpha$ 9-APC-Cy5.5 | Pax7+ iTCEs |
|----------------|-------------------------------------|----------------------------------------------|-------------------------------------------|------------------------------------|----------------------------------|----------------------------------|---------------------------|--------------------------------------|-------------------------------------------------------|-------------|
| Rep 1.         | 87.01                               | 88.18                                        | 12.88                                     | 23.05                              | 71.47                            | 7.87                             | 25.11                     | 8.03                                 | 80.88                                                 | 99.01       |
| Rep 2.         | 89.58                               | 91.87                                        | 8.01                                      | 19.55                              | 68.04                            | 5.12                             | 24.77                     | 8.78                                 | 81.17                                                 | 98.13       |
| Rep 3.         | 84.14                               | 85.04                                        | 13.01                                     | 23.27                              | 72.36                            | 6.98                             | 24.13                     | 5.63                                 | 78.98                                                 | 99.12       |

**Appendix Table S6: Flow cytometry quantification for Figure 3A-I.** The table shows the results of 3 independent experimental repeats (Rep) in percent of total cells.
